This is an Open Access article distributed under the terms of the Creative Commons Attribution License (<http://creativecommons.org/licenses/by/4.0/>), which permits unrestricted reuse, distribution, and reproduction in any medium, provided the original work is properly cited.  
doi:10.1093/applin/amx044 Advance Access published on 9 November 2017

## CORRIGENDUM

# Translanguaging as a Practical Theory of Language

\*LI WEI

UCL Centre for Applied Linguistics, UCL Institute of Education, University College London

\*E-mail: [li.wei@ucl.ac.uk](mailto:li.wei@ucl.ac.uk)

doi:10.1093/applin/amx039

The author wishes to apologize for an error in the original text of this article. The phrase 'The word *Ænglisc* only appeared in the mid-17th century' appeared in error – this has now been removed from the manuscript, and the relevant sentence edited to maintain sense.
